# Supplementary material for: A photochromic–acidochromic HCl fluorescent probe. An unexpected chloride-directed recognition
Source: Royal Society of Chemistry journal article supplement (doi:10.1039/c6an00509h), 2016-01-01
Supplement: c6an00509h1.pdf [file c6an00509h1.pdf]

*Electronic Supporting Information for*

A photochromic-acidochromic HCl fluorescent probe.

An unexpected chloride-directed recognition

Arturo Jiménez-Sánchez<sup>a,\*</sup> and Rosa Santillan<sup>b</sup>

<sup>a</sup> Facultad de Química, Universidad Nacional Autónoma de México, 04510 México D.F., México.

<sup>b</sup> Departamento de Química, Centro de Investigación y de Estudios Avanzados del IPN, CINVESTAV, Apdo., Postal 14-740, México, D. F. 07000, México.

Fax: 55 5616 2010; Tel: 55 5622 3813; E-mail: [arturo@cinvestav.mx](mailto:arturo@cinvestav.mx)

To whom correspondence should be addressed: [arturo@cinvestav.mx](mailto:arturo@cinvestav.mx)

## Synthesis and characterization

*4-(Dimethylaminophenyl)allylideneamino-1-aminomethyl-1-cyclohexanol* (**S1**). Schiff base derivative **S1** was prepared through the condensation reaction of 4-dimethylamino-*trans*-cinnamaldehyde (1.00 g, 5.7 mmol) and 1-aminomethyl-1-cyclohexanol (0.74 g, 5.7 mmol), stirring for 2 h under reflux of methanol. The solvent and water formed during the reaction were removed with a Dean-Stark trap to yield a solid, which was washed with *n*-hexane/ethyl acetate mixtures (9:1), to give 1.58 g (5.4 mmol, >95% yield) of **S1**. m.p.: 165-167°C. <sup>1</sup>H NMR (DMSO- $\delta_6$ , 300 MHz)  $\delta$ : 7.95 (1H, d,  $J = 9.0$  Hz, N<sub>imine</sub> proton), 7.43 (2H, d,  $J = 9.0$  Hz), 6.97 (1H, d,  $J = 15.0$  Hz), 6.73 (2H, d,  $J = 6.0$  Hz), 3.99 (1H, s), 3.38-3.35 (4H, d), 2.97 (6H, s), 1-7-1.1 (11H, m) ppm. Anal. Calcd. for C<sub>18</sub>H<sub>26</sub>N<sub>2</sub>O: C 75.48, H 9.15, N 9.78; found: C 75.61, H 9.52, N 9.71. HR-ESI-MS:  $m/z$  for C<sub>18</sub>H<sub>26</sub>N<sub>2</sub>O [M<sup>+</sup> + H]: 286.2042; found: 286.2043 (error 0.0521 ppm).

<sup>1</sup>H NMR spectrum for **S1** in DMSO- $\delta_6$ , 300 MHz

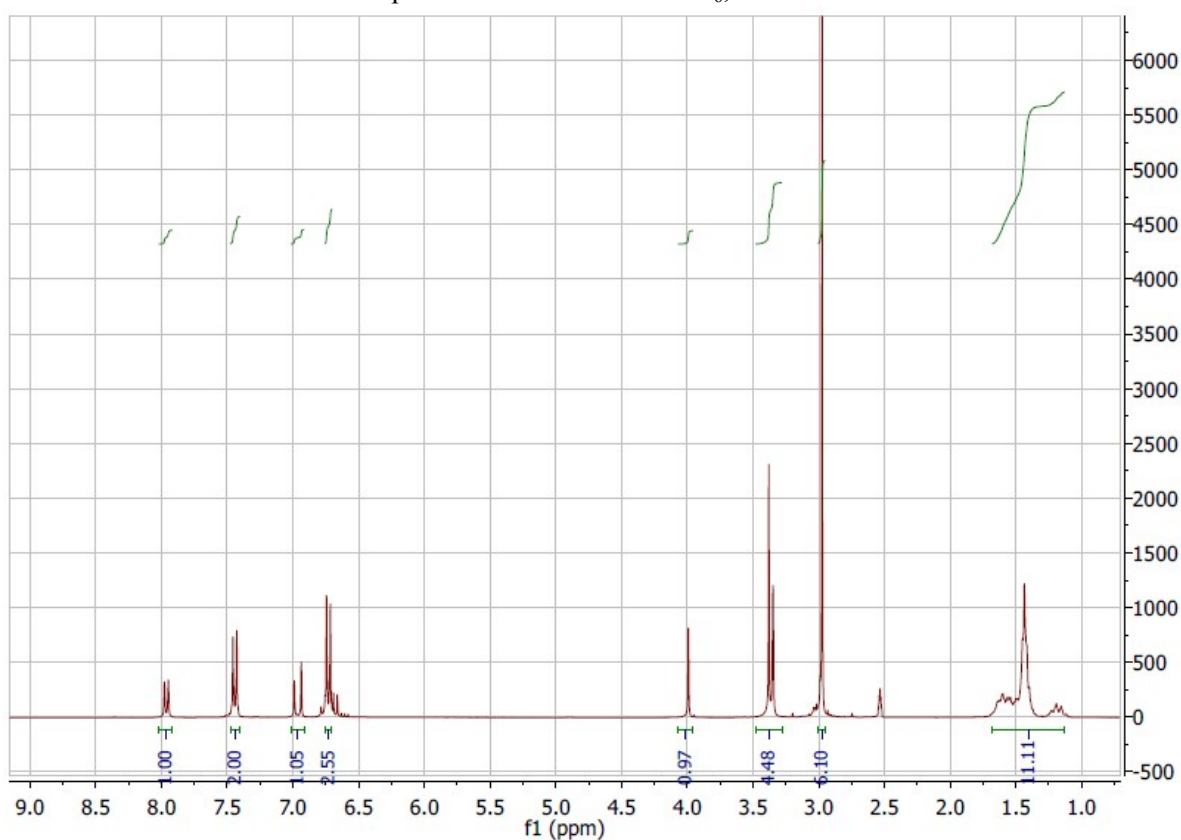

**Table S1** Summary of crystal data for **S1** at 293 K

| Compound                                 | S1                                                 |
|------------------------------------------|----------------------------------------------------|
| Crystal color                            | Red                                                |
| Empirical formula                        | C <sub>18</sub> H <sub>27</sub> N <sub>2</sub> OCl |
| Mol wt.                                  | 322.88                                             |
| Crystal System                           | Monoclinic                                         |
| Space group                              | <i>P</i> 2 <sub>1</sub> / <i>a</i>                 |
| a (Å)                                    | 14.388(2)                                          |
| b (Å)                                    | 6.189(3)                                           |
| c (Å)                                    | 20.392(2)                                          |
| α (°)                                    | 90                                                 |
| β (°)                                    | 98.158                                             |
| γ (°)                                    | 90                                                 |
| V (Å <sup>3</sup> )                      | 1797.48(5)                                         |
| Z                                        | 4                                                  |
| ρ <sub>calcd.</sub> (g/cm <sup>3</sup> ) | 1.190                                              |
| Θ Range (°)                              | 27.20                                              |
| F(000)                                   | 696.0                                              |
| Abs. Coeff. (mm <sup>-1</sup> )          | 0.217                                              |
| No. of reflections:                      |                                                    |
| Measured                                 | 11102                                              |
| Unique                                   | 3883                                               |
| Observed                                 | 2637                                               |
| R [I > 2σ(I)]                            | 0.055                                              |
| Rw (all data)                            | 0.090                                              |
| Parameters                               | 204                                                |
| ρ <sub>min</sub> (e Å <sup>-3</sup> )    | -0.206                                             |
| ρ <sub>max</sub> (e Å <sup>-3</sup> )    | 0.178                                              |
| GOOF                                     | 1.041                                              |

**Table S1b.** Geometric parameters (Å, °)

Special details 30 Geometry All e.s.d.'s (except the e.s.d. in the dihedral angle between two l.s. planes) are estimated using the full covariance matrix. The cell e.s.d.'s are taken into account individually in the estimation of e.s.d.'s in distances, angles and torsion angles; correlations between e.s.d.'s in cell parameters are only used when they are defined by crystal symmetry. An approximate (isotropic) treatment of cell e.s.d.'s is used for estimating e.s.d.'s involving l.s. planes.

Fractional atomic coordinates and isotropic or equivalent isotropic displacement parameters (Å<sup>2</sup>)

|     | <b>x</b>     | <b>y</b>   | <b>z</b>     | <b>U<sub>iso</sub><sup>*</sup>/U<sub>eq</sub></b> |
|-----|--------------|------------|--------------|---------------------------------------------------|
| C1  | 0.11357 (14) | 0.9005 (3) | 1.06998 (10) | 0.0431 (5)                                        |
| C2  | 0.15199 (14) | 1.1004 (3) | 1.05494 (10) | 0.0466 (5)                                        |
| H2  | 0.1676       | 1.2014     | 1.0885       | 0.056*                                            |
| C2A | 0.09109 (15) | 0.7538 (3) | 1.01703 (10) | 0.0479 (5)                                        |
| H2A | 0.0649       | 0.6206     | 1.0249       | 0.057*                                            |
| C3  | 0.16671 (14) | 1.1486 (3) | 0.99158 (10) | 0.0449 (5)                                        |
| H3  | 0.1914       | 1.2830     | 0.9831       | 0.054*                                            |
| C3A | 0.10726 (15) | 0.8045 (3) | 0.95430 (10) | 0.0480 (5)                                        |
| H3A | 0.0920       | 0.7039     | 0.9206       | 0.058*                                            |
| C4  | 0.14585 (13) | 1.0022 (3) | 0.93925 (10) | 0.0417 (5)                                        |
| C5  | 0.16721 (14) | 1.0558 (3) | 0.87420 (10) | 0.0471 (5)                                        |
| H5  | 0.1915       | 1.1932     | 0.8693       | 0.057*                                            |

|      |              |              |              |            |
|------|--------------|--------------|--------------|------------|
| C6   | 0.15615 (15) | 0.9301 (4)   | 0.81964 (10) | 0.0485 (5) |
| H6   | 0.1327       | 0.7907       | 0.8220       | 0.058*     |
| C7   | 0.17974 (14) | 1.0074 (3)   | 0.75882 (10) | 0.0475 (5) |
| H7   | 0.2054       | 1.1451       | 0.7578       | 0.057*     |
| C8   | 0.19243 (15) | 0.9747 (4)   | 0.64209 (10) | 0.0502 (5) |
| H8A  | 0.1846       | 1.1304       | 0.6398       | 0.060*     |
| H8B  | 0.1497       | 0.9118       | 0.6061       | 0.060*     |
| C9   | 0.29305 (14) | 0.9185 (3)   | 0.63302 (9)  | 0.0435 (5) |
| C10  | 0.31057 (16) | 1.0087 (4)   | 0.56629 (11) | 0.0589 (6) |
| H10A | 0.2631       | 0.9531       | 0.5319       | 0.071*     |
| H10B | 0.3043       | 1.1647       | 0.5669       | 0.071*     |
| C11  | 0.40716 (18) | 0.9510 (5)   | 0.54943 (13) | 0.0721 (7) |
| H11A | 0.4124       | 1.0009       | 0.5050       | 0.086*     |
| H11B | 0.4548       | 1.0240       | 0.5799       | 0.086*     |
| C12  | 0.42410 (18) | 0.7097 (5)   | 0.55343 (14) | 0.0798 (9) |
| H12A | 0.4880       | 0.6797       | 0.5462       | 0.096*     |
| H12B | 0.3821       | 0.6385       | 0.5187       | 0.096*     |
| C13  | 0.40838 (17) | 0.6189 (4)   | 0.62014 (14) | 0.0692 (7) |
| H13A | 0.4552       | 0.6771       | 0.6545       | 0.083*     |
| H13B | 0.4155       | 0.4631       | 0.6199       | 0.083*     |
| C14  | 0.31053 (16) | 0.6762 (4)   | 0.63520 (12) | 0.0565 (6) |
| H14A | 0.2640       | 0.6057       | 0.6032       | 0.068*     |
| H14B | 0.3032       | 0.6221       | 0.6788       | 0.068*     |
| C15  | 0.1190 (2)   | 1.0001 (5)   | 1.18696 (12) | 0.0791 (8) |
| H15A | 0.1040       | 0.9352       | 1.2269       | 0.119*     |
| H15B | 0.1844       | 1.0370       | 1.1926       | 0.119*     |
| H15C | 0.0820       | 1.1283       | 1.1774       | 0.119*     |
| C15A | 0.0576 (2)   | 0.6438 (4)   | 1.14711 (12) | 0.0682 (7) |
| H15D | 0.0526       | 0.6367       | 1.1935       | 0.102*     |
| H15E | -0.0037      | 0.6308       | 1.1218       | 0.102*     |
| H15F | 0.0967       | 0.5281       | 1.1357       | 0.102*     |
| N1   | 0.9853 (14)  | 0.8483 (3)   | 1.13249 (9)  | 0.0555 (5) |
| N2   | 1.6764 (12)  | 0.8975 (3)   | 0.70494 (9)  | 0.0483 (4) |
| O1   | 3.4878 (10)  | 1.0263 (3)   | 0.68645 (7)  | 0.0588 (4) |
| H1   | 4.045        | 1.0084       | 0.6836       | 0.088*     |
| Cl10 | 0.07460 (4)  | 0.45625 (10) | 0.71228 (3)  | 0.0680 (2) |
| H100 | 0.1427 (16)  | 0.764 (4)    | 0.7049 (11)  | 0.059 (7)* |

Geometric parameters ( $\text{\AA}$ ,  $^\circ$ )

|           |             |            |             |
|-----------|-------------|------------|-------------|
| C1—N1     | 1.362 (3)   | C8—N2      | 1.459 (3)   |
| C1—C2     | 1.407 (3)   | C8—C9      | 1.526 (3)   |
| C1—C2A    | 1.412 (3)   | C9—O1      | 1.424 (2)   |
| C2—C3     | 1.372 (3)   | C9—C14     | 1.520 (3)   |
| C2A—C3A   | 1.369 (3)   | C9—C10     | 1.525 (3)   |
| C3—C4     | 1.400 (3)   | C10—C11    | 1.521 (3)   |
| C3A—C4    | 1.396 (3)   | C11—C12    | 1.513 (4)   |
| C4—C5     | 1.442 (3)   | C12—C13    | 1.518 (4)   |
| C5—C6     | 1.348 (3)   | C13—C14    | 1.525 (3)   |
| C6—C7     | 1.415 (3)   | C15—N1     | 1.452 (3)   |
| C7—N2     | 1.283 (3)   | C15A—N1    | 1.445 (3)   |
| N1—C1—C2  | 122.14 (18) | O1—C9—C10  | 111.40 (18) |
| N1—C1—C2A | 120.92 (18) | C14—C9—C10 | 109.86 (18) |
| C2—C1—C2A | 116.94 (18) | O1—C9—C8   | 103.97 (16) |
| C3—C2—C1  | 120.98 (18) | C14—C9—C8  | 112.17 (18) |

|            |             |             |             |
|------------|-------------|-------------|-------------|
| C3A—C2A—C1 | 121.09 (19) | C10—C9—C8   | 107.74 (16) |
| C2—C3—C4   | 122.16 (19) | C11—C10—C9  | 112.82 (19) |
| C2A—C3A—C4 | 122.15 (19) | C12—C11—C10 | 111.4 (2)   |
| C3A—C4—C3  | 116.67 (18) | C11—C12—C13 | 111.7 (2)   |
| C3A—C4—C5  | 123.18 (18) | C12—C13—C14 | 110.7 (2)   |
| C3—C4—C5   | 120.11 (18) | C9—C14—C13  | 112.16 (19) |
| C6—C5—C4   | 127.6 (2)   | C1—N1—C15A  | 121.61 (18) |
| C5—C6—C7   | 120.9 (2)   | C1—N1—C15   | 121.40 (19) |
| N2—C7—C6   | 123.4 (2)   | C15A—N1—C15 | 116.93 (19) |
| N2—C8—C9   | 112.73 (16) | C7—N2—C8    | 123.9 (2)   |
| O1—C9—C14  | 111.53 (17) |             |             |

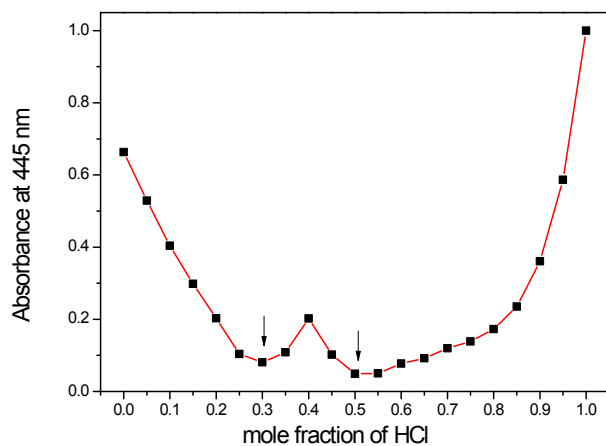

**Figure S1.** Continuous variation curve (Job's plot) for probe **S1** vs. HCl in water evaluated at 445 nm. The final concentration was 10  $\mu$ M.

**Table S2.** Solvatochromic analysis for **HCl·S1** crystals

| <i>Solvent</i>       | <i>E</i> | <i>n</i> | <i>Δf</i> | $\lambda_a$<br>(nm) | $\bar{\nu}_a$<br>(cm <sup>-1</sup> ) | $\lambda_e$<br>(nm) | $\bar{\nu}_e$<br>(cm <sup>-1</sup> ) | $\bar{\nu}_a - \bar{\nu}_e$<br>(cm <sup>-1</sup> ) |
|----------------------|----------|----------|-----------|---------------------|--------------------------------------|---------------------|--------------------------------------|----------------------------------------------------|
| <b>Cyclohexane</b>   | 2.02     | 1.4235   | 0         | 350                 | 28571                                | 397                 | 25136                                | 3435                                               |
| <b>Dioxane</b>       | 2.22     | 1.4224   | 0.021     | 353                 | 28328                                | 411                 | 24325                                | 4004                                               |
| <b>Toluene</b>       | 2.38     | 1.4961   | 0.013     | 357                 | 28011                                | 413                 | 24216                                | 3795                                               |
| <b>Diethyl ether</b> | 4.27     | 1.3526   | 0.165     | 351                 | 28491                                | 409                 | 24457                                | 4034                                               |
| <b>MTBE</b>          | 4.50     | 1.3690   | 0.1161    | 351                 | 28491                                | 412                 | 24268                                | 4223                                               |
| <b>Chloroform</b>    | 4.81     | 1.4459   | 0.148     | 467                 | 21413                                | 515                 | 19416                                | 1997                                               |
| <b>BAc</b>           | 5.07     | 1.3940   | 0.1163    | 358                 | 27933                                | 422                 | 23652                                | 4281                                               |
| <b>EAc</b>           | 6.081    | 1.3723   | 0.201     | 354                 | 28248                                | 421                 | 23751                                | 4497                                               |
| <b>THF</b>           | 7.52     | 1.4050   | 0.210     | 356                 | 28090                                | 419                 | 23873                                | 4216                                               |
| <b>DCM</b>           | 8.93     | 1.4242   | 0.217     | 361                 | 27700                                | 426                 | 23468                                | 4233                                               |
| <b>Octanol</b>       | 10.30    | 1.4295   | 0.225     | 364                 | 27472                                | 431                 | 23197                                | 4275                                               |
| <b><i>i</i>-PrOH</b> | 20.18    | 1.3776   | 0.277     | 361                 | 27700                                | 436                 | 22931                                | 4770                                               |
| <b>Acetone</b>       | 21.01    | 1.3588   | 0.285     | 354                 | 28248                                | 434                 | 23044                                | 5204                                               |
| <b>EtOH</b>          | 24.65    | 1.3611   | 0.289     | 363                 | 27548                                | 442                 | 22626                                | 4922                                               |
| <b>MeOH</b>          | 33.00    | 1.3288   | 0.308     | 463                 | 21598                                | 517                 | 19342                                | 2255                                               |
| <b>ACN</b>           | 36.64    | 1.3442   | 0.305     | 355                 | 28169                                | 441                 | 22672                                | 5497                                               |
| <b>DMF</b>           | 36.70    | 1.4305   | 0.274     | 357                 | 28011                                | 444                 | 22526                                | 5485                                               |
| <b>EG</b>            | 41.40    | 1.4320   | 0.276     | 467                 | 21413                                | 524                 | 19083                                | 2331                                               |
| <b>DMSO</b>          | 46.68    | 1.4793   | 0.263     | 359                 | 27855                                | 455                 | 21986                                | 5869                                               |
| <b>Water</b>         | 80.40    | 1.3325   | 0.279     | 464                 | 21552                                | 527                 | 18975                                | 2577                                               |

$\alpha$ : Dielectric constant, ( $\epsilon$ ), refractive index, ( $n$ );<sup>49</sup> Orientation polarizability, ( $\Delta f$ ); absorption wavelength, ( $\lambda_a$ ); absorption wavenumber, ( $\bar{\nu}_a$ ); emission wavelength, ( $\lambda_e$ ); emission wavenumber, ( $\bar{\nu}_e$ ). Solvent notation: MTBE (methyl *t*-butyl ether), THF (tetrahydrofuran), DCM (dichloromethane), *i*-PrOH (*iso*-propanol), BAc (butyl acetate), EAc (ethyl acetate), EtOH (ethanol), MeOH (methanol), ACN (acetonitrile), DMF (Dimethylformamide), EG (Ethylene Glycol), DMSO (Dimethyl sulfoxide).

The various contributions to the electronic excitation can be clarified by a Natural Transition Orbital (NTO) analysis,<sup>79</sup> which provides a compact orbital representation of the electronic transition through a single configuration of a hole and electron interaction. Consequently, the photoinduced electron transfer process is not depicted by a simple change in the elementary molecular orbital occupancy, but in a hole – electron distribution. Then, to have a better understanding of the multiresponse mechanism of probe **S1**, the representative transition energy diagram for the HOMO–LUMO orbitals was obtained, Figure S2. In general, the calculated NTO distributions show that the electronic transitions within **S1** are dominated by an ICT character due to the HOMO–LUMO levels for the whole system, assigned to a  $\pi \rightarrow \pi^*$  electronic transition. Moreover, the ICT character in [HCl(**S1**)] is not maintained, and a decrease in the transition energy of the HOMO–LUMO vertical excitation arises with the HOMO level located *ca.* 0.46 eV below the HOMO level of **S1**, therefore, the ICT process prohibits the radiative deactivation (fluorescence). The

NTO coefficients ( $w$ ) representing the extent to which the electronic excitation can be written as a single excitation are 0.99, and 1.0 for **S1** and [HCl(**S1**)], respectively.

|                                                             | Hole                                                                              | Particle                                                                            |
|-------------------------------------------------------------|-----------------------------------------------------------------------------------|-------------------------------------------------------------------------------------|
| <b>S1</b> 329.1 nm; $f = 1.210$ ; 78 – 79; $w = 0.99$       | 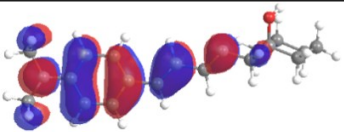 |  |
| <b>S1-HCl</b> 959.7 nm; $f = 0.008$ ; 87 – 88<br>$w = 0.99$ |  |  |
| <b>S1-HCl</b> 374.3 nm; $f = 1.178$ ; 84 – 88<br>$w = 1.0$  |  |  |

**Figure S2.** Natural transition orbitals for **S1** and [HCl(**S1**)] computed at PBE0/6-31+G(d,p)/IEF-PCM-Water.
